# Supplementary Table 2

**Table S2: Median time to death (days) for clustering performed on only the 2976 subjects with actual death data**

|                                                | <b>Low Death Risk</b>       | <b>High Death Risk</b>      |
|------------------------------------------------|-----------------------------|-----------------------------|
| <b>Subjects with actual death data, n=2976</b> | <b>Median days to death</b> | <b>Median days to death</b> |
|                                                | 338 days, n=1504 subjects   | 142 days, n=1472 subjects   |
