# Supplementary Table 3

**Table S3: Baseline ALSFRS-R total score mean and standard deviations of the 790 subjects with both decline and survival classifications**

|                         | Survival        |                |
|-------------------------|-----------------|----------------|
|                         | High death risk | Low death risk |
| Estimated decline class |                 |                |
| Fast progressor         | 36.9 (5.1)      | 37.5 (6.0)     |
| Slow progressor         | 38.7 (5.2)      | 39.7 (4.8)     |
